# Supplementary material
Source: MDPI journal article supplement (https://www.mdpi.com/2311-7524/10/5/488)
Supplement: s1 [file s1]

**Table S1.** Primers used in this study

| Gene           | Gene accession number | Forward primer sequence (5'-3') | Reverse primer sequence (5'-3') |
|----------------|-----------------------|---------------------------------|---------------------------------|
| <i>CmAII</i>   | MELO3C005363          | ATCCAATGGCCTGTGGAAGA            | CCACTTCAAACCTCCGCCAAT           |
| <i>CmAII2</i>  | MELO3C005364          | CTCATCCCTCCGCCTTACTC            | GGATTCTGGGAGATGAGGTGT           |
| <i>CmNII</i>   | MELO3C001505          | CGGACAATGCTTGCACCTC             | GACGAAACCCATCCACCAAG            |
| <i>CmNII2</i>  | MELO3C006727          | CCAACCTCTTGATGGAAGCG            | TGCCTGTCTGTACGTCAACT            |
| <i>CmNII3</i>  | MELO3C024083          | GAAAGCCATGAGTGGCGAAT            | AGCTGTTAGCAGCCACAGTA            |
| <i>CmSSI</i>   | MELO3C001956          | CGATGAACGTTGGATTGCCT            | TGAAGACCGGCTTCTGACAT            |
| <i>CmSSI2</i>  | MELO3C022252          | TGGGTCCGATGTTCTAAGGG            | AGTAACTGTCTTCGGTGGCA            |
| <i>CmSSI3</i>  | MELO3C025101          | TCGTTGGGTTTCTCGTTTCG            | GCCATGAGAGATGCCACAAG            |
| <i>CmSPSI</i>  | MELO3C008101          | ACCTCCAGGCATGGATTTCA            | AGGGTCAGGGCGAGATAATG            |
| <i>CmSPS2</i>  | MELO3C010300          | GCTCAGCCAGATCCACCTAT            | GCCGACATTCTCCAAATGCT            |
| <i>CmSPS3</i>  | MELO3C012336          | TCTGGTGGTGGGTACAGTTC            | ATTCCGGTAAGCCTTCCCAA            |
| <i>CmSPS4</i>  | MELO3C020357          | TGAAAGCCTTCGGAGAGTGT            | TGGGTATGCCACTTGACCAT            |
| <i>CmHXK1</i>  | MELO3C014574          | GGCTGTCTGAGGGAGGATTAT           | TGTGATGCACTACAAGTGC             |
| <i>CmPAL1</i>  | MELO3C014223          | AGGAACAAGGCTTTGCATGG            | GCTCGGGTTTCTACTTGCAG            |
| <i>CmPAL2</i>  | MELO3C014224          | GCTGAGGCTGCCTTTAAACA            | CCTACAGCAGTGCCATTGAC            |
| <i>CmPAL3</i>  | MELO3C014226          | GGGAAGCTCATGTTTGCTCA            | TGCTCAGCACTTTGAACATGA           |
| <i>CmPAL4</i>  | MELO3C014227          | CTGCAAGCAGAAACCCAAGT            | GTTGCTCAGCACTTTGGACA            |
| <i>CmPAL5</i>  | MELO3C014228          | CTGCAAGCAGAAACCCAAGT            | GTTGCTCAGCACTTTGGACA            |
| <i>CmPAL6</i>  | MELO3C014229          | GCAGAGGGAGCTCATACGAT            | GTAGCCTTGAAGGAGGGTGT            |
| <i>CmPAL7</i>  | MELO3C017809          | CTGGTGAAGCTTGGAGGAGA            | AGTGCCTTTACCCATGCTCT            |
| <i>CmPAL8</i>  | MELO3C017810          | AGAGCATGGGTAAAGGCACT            | TTGTTGCGGAATGAGGCAAA            |
| <i>CmPAL9</i>  | MELO3C017811          | CTGGTGAAGCTTGGAGGAGA            | AGTGCCTTTACCCATGCTCT            |
| <i>CmC4H1</i>  | MELO3C003932          | GCCAAGTCTCCATGCTCAG             | CATCCTCCCACATGCCACTA            |
| <i>CmC4H2</i>  | MELO3C019585          | CAGAGCTAGTGAACCAACCA            | GGAGGTATGGGAGCTTGTGT            |
| <i>CmC4H3</i>  | MELO3C003933          | GCTTGCTAGCCAAGTTCTCC            | TCTACGCATCTTACGCCAGT            |
| <i>CmC4H4</i>  | MELO3C003934          | GGAATTCAGGCCAGAGAGGT            | TTCTTCTTCCAACGCCGAAC            |
| <i>Cm4CL1</i>  | MELO3C023493          | TCCCACATTACATTCCCA              | CCGTAAGCTGAACGTCATGG            |
| <i>Cm4CL2</i>  | MELO3C024886          | ATGAAGATCGTCGACACCGA            | TGCCTCCGATTGTTGAGAT             |
| <i>Cm4CL3</i>  | MELO3C009362          | CCTCGTCTCCAATCCACTT             | GAATCCCGAGTTGGCTGAAC            |
| <i>β-actin</i> | MELO3C023264          | CCGTTCTGTCCCTCTATGCT            | AGTAAGGTCACGACCAGCAA            |
